# Supplementary material
Source: PubMed Central journal article supplement (PMC2934681)
Supplement: supp_M110.101964_jbc.M110.101964-1.pdf [file supp_M110.101964_jbc.M110.101964-1.pdf]

**SUPPLEMENTAL TABLE 1: Effects of Aln, DMAb, Aln plus PTH, or DMAb plus PTH on the biomechanical properties of the femoral cortical midshaft in huRANKL mice**

|                                                      | Sham (6)      | OVX                        |                            |                            |                            |                         |                |
|------------------------------------------------------|---------------|----------------------------|----------------------------|----------------------------|----------------------------|-------------------------|----------------|
|                                                      |               | No PTH                     |                            |                            | PTH                        |                         |                |
|                                                      |               | Veh (6)                    | Aln (6)                    | DMAb (8)                   | Veh (7)                    | Aln (7)                 | DMAb (8)       |
| Maximal load (N)                                     | 24.9 ± 0.7    | 22.7 ± 1.3                 | 23.3 ± 0.9                 | 22.7 ± 2.3                 | 26.6 ± 1.8                 | 27.7 ± 1.8 <sup>d</sup> | 25.9 ± 1.4     |
| Stiffness (N/mm)                                     | 86.3 ± 3.1    | 72.9 ± 7.3                 | 72.0 ± 6.8                 | 78.6 ± 7.2                 | 93.7 ± 8.1 <sup>d</sup>    | 90.0 ± 2.7 <sup>d</sup> | 88.6 ± 3.9     |
| Moment of inertia, I <sub>x</sub> (mm <sup>4</sup> ) | 0.157 ± 0.006 | 0.127 ± 0.005 <sup>a</sup> | 0.162 ± 0.010 <sup>b</sup> | 0.154 ± 0.007 <sup>b</sup> | 0.155 ± 0.007 <sup>d</sup> | 0.164 ± 0.009           | 0.159 ± 0.005  |
| Ultimate stress (MPa)                                | 252.02 ± 7.64 | 274.12 ± 16.27             | 234.79 ± 18.19             | 237.79 ± 17.48             | 276.41 ± 13.21             | 275.44 ± 17.55          | 264.07 ± 18.47 |
| Young's modulus, E (MPa)                             | 11131 ± 369   | 11540 ± 1053               | 9250 ± 614                 | 10457 ± 1191               | 12316 ± 1055               | 11266 ± 611             | 11348 ± 657    |

In parenthesis, number of mice per group

a,  $p < 0.05$  compared with sham

b,  $p < 0.05$  compared with OVX Veh

d,  $p < 0.05$  compared with non-PTH in the same pre-treatment group
